# Supplementary material
Source: bioRxiv or medRxiv preprint supplement (https://medrxiv.org/highwire/filestream/98128/field_highwire_adjunct_files/0/2020.09.18.20195370-1.pdf)
Supplement: Supplementary file [file 2020.09.18.20195370-1.pdf]

## Introduction to the protocol

Version: LMP\_9101\_v1\_rev4\_01Jul2020

# Overview of the protocol

## Introduction to LamPORE

LamPORE has been developed by Oxford Nanopore Technologies to enable the simple and rapid detection of target regions of single or multiple genomes in a highly multiplexed manner.

The system is designed to deliver the following:

- Scale: run 1–2,000 samples on a MinION and up to 20,000 samples on a GridION per day
- Speed: sample to answer can be delivered in under 2 hours
- Simplicity: library preparation is easy to run
- Affordable: the system delivers low cost per test
- Deployable: the system requires only very basic laboratory set-up

In its first iteration, LamPORE is designed to detect the presence or absence of the SARS-CoV-2 virus responsible for the COVID-19 pandemic.

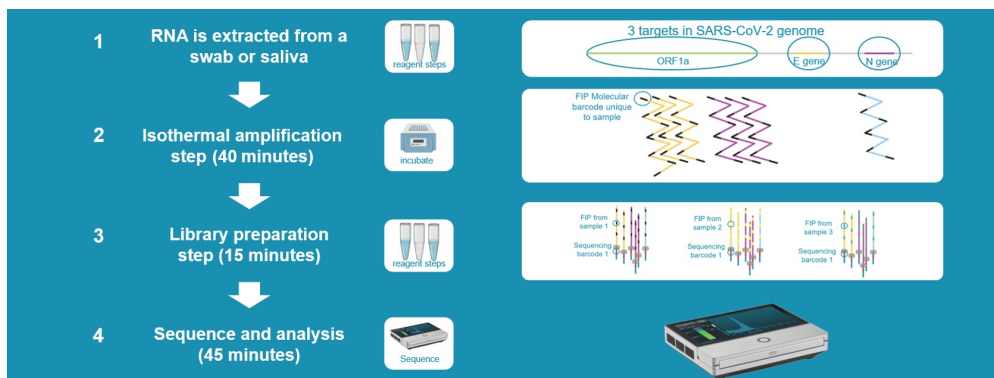

LamPORE is a combination of loop-mediated isothermal amplification (LAMP) and Nanopore sequencing. By placing barcodes in the LAMP reaction and coupling these with Oxford Nanopore's rapid barcoding technology, a dual indexing approach is achieved, enabling a large number of barcode combinations to be generated and sequenced.

## LAMP amplification

LAMP is a single-tube technique for the amplification of DNA and a low-cost alternative to detect certain diseases. Reverse Transcription Loop-mediated Isothermal Amplification (RT-LAMP) combines LAMP with a reverse transcription step to allow the detection of RNA targets.

LAMP is an isothermal nucleic acid amplification technique, meaning that it is carried out at a constant temperature. This is in contrast to the Polymerase Chain Reaction (PCR), in which the reaction is carried out with a series of alternating temperature steps or cycles.

LAMP amplification assays require 6 primers:

- A forward outer primer
- A backward outer primer
- A forward inner primer
- A backward inner primer
- A loop forward primer
- A loop backward primer

## Introduction to the protocol

Version: LMP\_9101\_v1\_rev4\_01Jul2020

The primers used in this assay are specific to three regions of the SARS-CoV-2 genome (the N, E and ORF1a genes). Each target region spans approximately 180 bp of the genome.

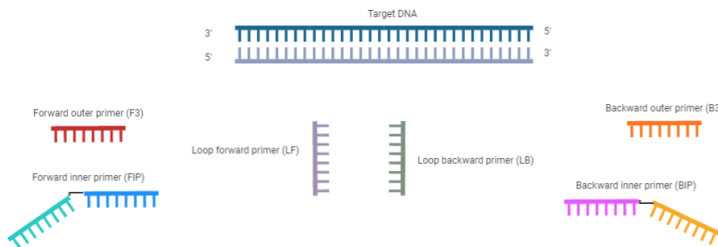

As SARS CoV-2 is an RNA virus, the first step of this reaction is a reverse transcription to generate a cDNA molecule for the amplification chemistry to work with. This RT step is part of the LAMP process.

To perform amplification, a strand-displacing polymerase is added and the reaction is incubated at 65°C for 35 minutes. In the initial stages of the reaction, the enzyme produces a series of dumbbell-shaped molecules and these are then exponentially amplified. Amplification of the dumbbell-shaped molecules results in long molecules consisting of concatenated copies of the original 180 bp target region.

To enable pooling of multiple samples into a single sequencing run, the LamPORE SARS-CoV-2 primers also include a 10-nucleotide molecular barcode on the Forward Inner Primer (FIP) between the F2 and F1C regions. Following amplification, several copies of a barcode are incorporated into each product molecule.

At the end of the reaction, the enzymes are inactivated by incubation at 80°C for 5 minutes. LAMP produces a variety of products including multimeric DNA with inverted repeats. These complex amplification products are converted into nanopore sequencing libraries using the rapid barcoding chemistry. A second barcode is added at this stage to further increase the number of samples that can be analysed in parallel.

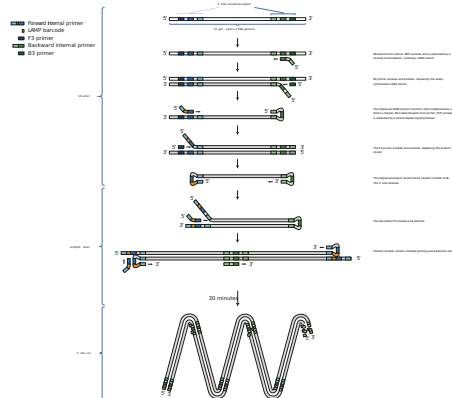

## Rapid barcoding

To further increase the number of samples being analysed in parallel, rapid barcodes are used to enable dual barcoding.

LamPORE uses the rapid barcodes for two reasons: the first reason is speed and simplicity. Secondly, being transposase-based, the preparation method cuts the loop products generated during LAMP, turning them into linear molecules which can then be sequenced.

To prepare a rapid barcoded library, you will need to:

- Tagment your DNA using the Fragmentation Mix RB; this simultaneously attaches a pair of barcodes to the fragments
- Pool the barcoded samples
- Purify the sample using AMPure XP beads
- Attach sequencing adapters to the DNA ends
- Prime the flow cell, and load your DNA library into the flow cell

Introduction to the protocol

Version: LMP\_9101\_v1\_rev4\_01Jul2020

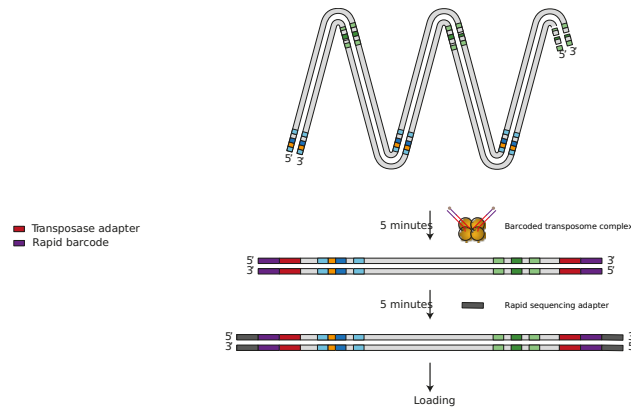

**Data analysis**

The result of a LAMP reaction is a concatemer molecule as can be seen in the alignment charts below:

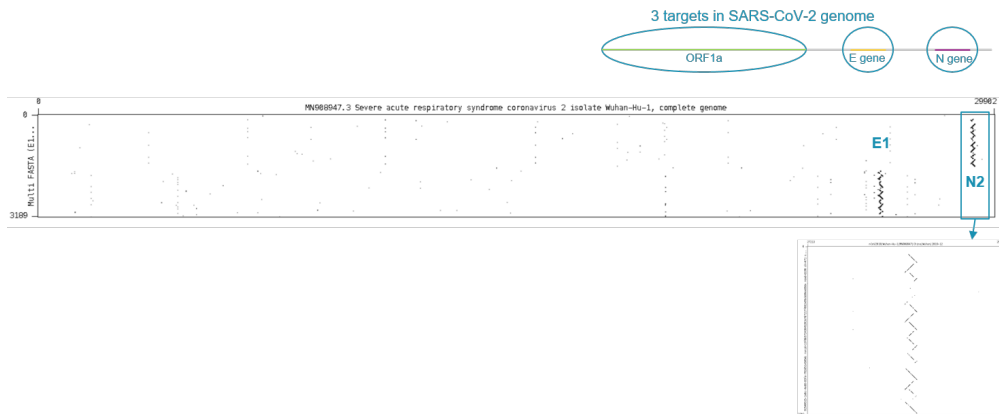

A 2 kb concatemer with sequence for 180 bp target region is aligned against the SARS-CoV-2 genome. It is normal for there to be a non-uniform distribution of the monomers, where some span the whole target region and others do not. An individual copy of the target region is sufficient to make an unambiguous identification of the target within the genome using standard sequence alignment methods. Where multiple copies are present in a concatemer, the first copy can be used to make the identification. Alternatively, as shown below, additional information is available from subsequent copies. In some cases, this additional information contains gaps due to the properties of current methods for sequencing this type of molecule. However, the additional information is also highly specific to the target and can be aggregated to enhance the measurement if desired.

## Introduction to the protocol

Version: LMP\_9101\_v1\_rev4\_01Jul2020

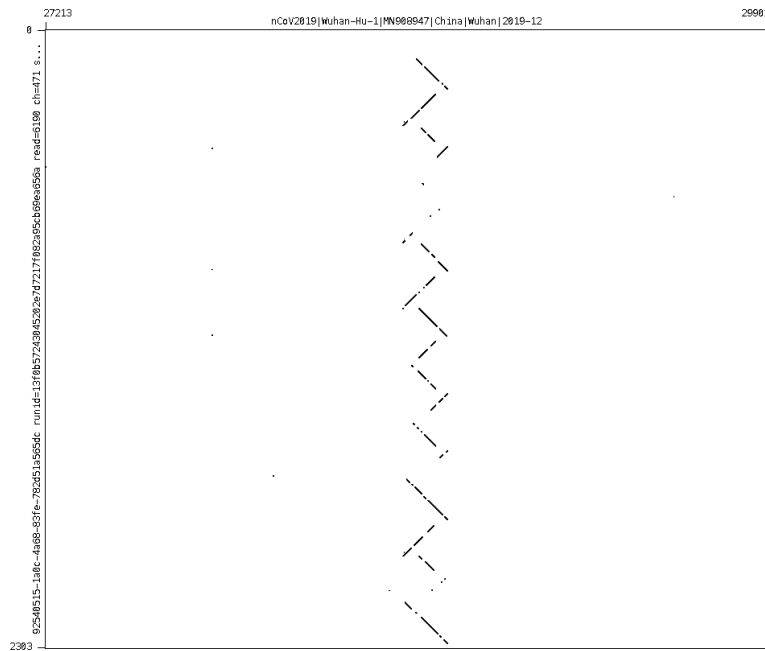

The reads produced will always have a rapid barcode at the start (in red), and most reads will have a FIP barcode (blue) located randomly along the molecule. Reads that do not have a FIP barcode will not be aligned against the reference by the analysis software.

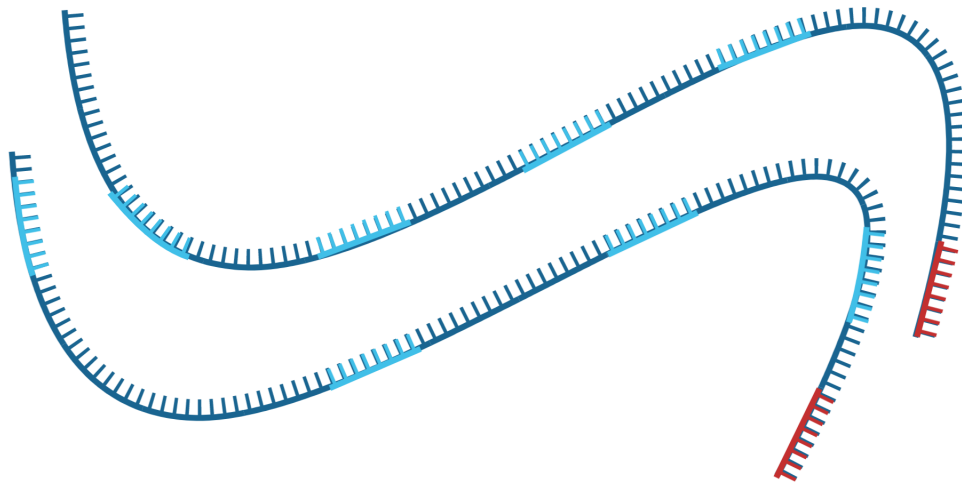

### Basecalling

Raw signal data is processed using basecalling algorithms contained in the MinKNOW software.

At the end of the sequencing experiment, when all reads have been basecalled, MinKNOW initiates the downstream analysis pipeline.

### Alignment

The analysis pipeline:

- Demultiplexes the reads by the FIP barcodes
- Aligns the reads against the SARS-CoV-2 genomic targets
- Generates a TSV file describing the number of reads for each barcode which align to the targets. A PDF report is also generated, containing classification results for every barcoded sample.

Only reads that have had barcodes identified will then be aligned against the SARS-CoV-2 genome. Those samples that align will be noted as positive (SARS-

## Equipment and consumables

Version: LMP\_9101\_v1\_rev4\_01Jul2020

CoV-2 detected) and those where no reads or few reads align will be noted as negative (SARS-CoV-2 not detected).

It is important to note that this read-out is to be used by a healthcare professional in combination with patient symptoms and healthcare history to inform the next course of treatment.

# Equipment and consumables

### Materials

- RNA samples
- LamPCRE COVID-19 Test Kit 96-plex S (CND-SQK-LP0096S)

### Consumables

- 1.5 ml Eppendorf DNA LoBind tubes
- 0.2 ml 96-well PCR plate
- 96-well plate lids or seals
- 0.2 ml thin-walled PCR tubes
- Nuclease-free water (e.g. ThermoFisher, cat # AM9937)
- Freshly prepared 80% ethanol in nuclease-free water
- Nuclease-free pipette filter tips

### Equipment

- PCR hood or bubble
- Thermal cycler with 96-well block
- Magnetic rack
- Microfuge
- Centrifuge capable of taking 96-well plates
- Timer
- Ice bucket with ice
- P1000 pipette
- P200 pipette
- P100 pipette
- P20 pipette
- P10 pipette
- P2 pipette
- Multichannel pipettes suitable for dispensing 0.5–10 µl, 2–20 µl and 20–200 µl, and tips

### LamPORE COVID-19 Test Kit 96 Plex S contents (OND-SQK-LP0096S)

Equipment and consumables

Version: LMP\_9101\_v1\_rev4\_01Jul2020

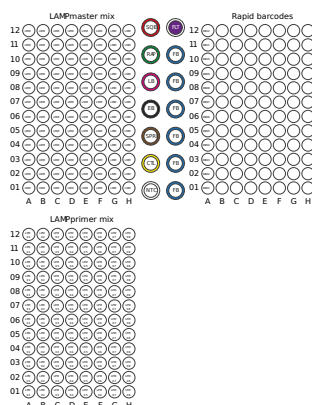

**Kit contents:**

| Kit component             | Description                                                                                                                                                                                                        | Number of tubes/wells                                                                                                                                                        |
|---------------------------|--------------------------------------------------------------------------------------------------------------------------------------------------------------------------------------------------------------------|------------------------------------------------------------------------------------------------------------------------------------------------------------------------------|
| LAMP Master Mix (LMM)     | Reagents and enzymes needed for the LAMP reaction                                                                                                                                                                  | 96 wells of the LMM plate contain the master mix                                                                                                                             |
| LAMP Primer Mixes (LPM)   | Primers for the LAMP reaction that hybridise to the ORF1a, N2 and E1 genes of the SARS-CoV-2 genome, as well as the B-actin gene as an internal control. FIP primers contain barcodes 1-8 for multiplexing samples | 96 wells of the LPM plate contain primers. FIP barcoded primers are arranged in rows, i.e. Row A contains primers with barcode 1, Row B contains primers with barcode 2 etc. |
| Rapid Barcodes (RBxx)     | Rapid Barcodes 1-12 for multiplexing samples                                                                                                                                                                       | Row A of the Rapid Barcodes plate contains barcodes 1-12 in wells A1-A12.                                                                                                    |
| Positive Control (CTL)    | Positive control containing synthetic SARS-CoV-2 RNA                                                                                                                                                               | 1 tube                                                                                                                                                                       |
| No Template Control (NTC) | Negative control containing nuclease-free water                                                                                                                                                                    | 1 tube                                                                                                                                                                       |
| SPRI Beads (SPRI)         | SPRI beads for purifying the pooled, barcoded library                                                                                                                                                              | 1 tube                                                                                                                                                                       |
| Rapid Adapter (RAP)       | Oligonucleotide adapter loaded with a processive enzyme that regulates the DNA passage through the nanopore                                                                                                        | 1 tube                                                                                                                                                                       |
| Sequencing Buffer (SQB)   | Fuel and other chemical co-factors for powering DNA translocation through the nanopore                                                                                                                             | 1 tube                                                                                                                                                                       |
| Loading Beads (LB)        | Polymer beads for improved sequencing yields                                                                                                                                                                       | 1 tube                                                                                                                                                                       |
| Elution Buffer (EB)       | Buffer for eluting the prepared DNA library from SPRI beads                                                                                                                                                        | 1 tube                                                                                                                                                                       |
| Flush Buffer (FB)         | Buffer used to flush the flow cell prior to loading the library                                                                                                                                                    | 6 tubes                                                                                                                                                                      |
| Flush Tether (FLT)        | Chemical tether added to Flush Buffer; brings the DNA library to the flow cell membrane and in closer proximity to the nanopores                                                                                   | 1 tube                                                                                                                                                                       |

## Computer requirements and software

Version: LMP\_9101\_v1\_rev4\_01Jul2020

### Kit shelf life and storage

The LamPORE COVID-19 Test Kit 96 Plex S has a shelf life of 3 months when stored at -20°C.

The Positive Control (CTL) tube should be taken out of the kit and stored at -80°C for up to 3 months.

# Computer requirements and software

### GridION IT requirements

The GridION device contains all the hardware required to control up to five flow cells and acquire the data. The device is further enhanced with high performance GPU technology for real-time basecalling. Read more in the [GridION IT requirements document](#).

### Software for nanopore sequencing

#### MinKNOW

The MinKNOW software (OND 19.12) controls the nanopore sequencing device, collects sequencing data in real time and processes it into basecalls. MinKNOW can also demultiplex reads by barcode.

#### Analysis

At the end of the sequencing experiment, when all reads have been basecalled, MinKNOW initiates the downstream analysis pipeline.

# Check your flow cell

#### Consumables

- CND Flow Cell (CND-FLC-M106D)

#### Equipment

- CND GridION Mk1 (CND-GRD003)

**In this step, you will use the MinKNOW software to check that the flow cell meets warranty. This has to be done prior to loading your library onto the flow cell.**

## Computer requirements and software

Version: LMP\_9101\_v1\_rev4\_01Jul2020

- 1 Switch on the GridION device. When the login screen appears, enter the password and log in.

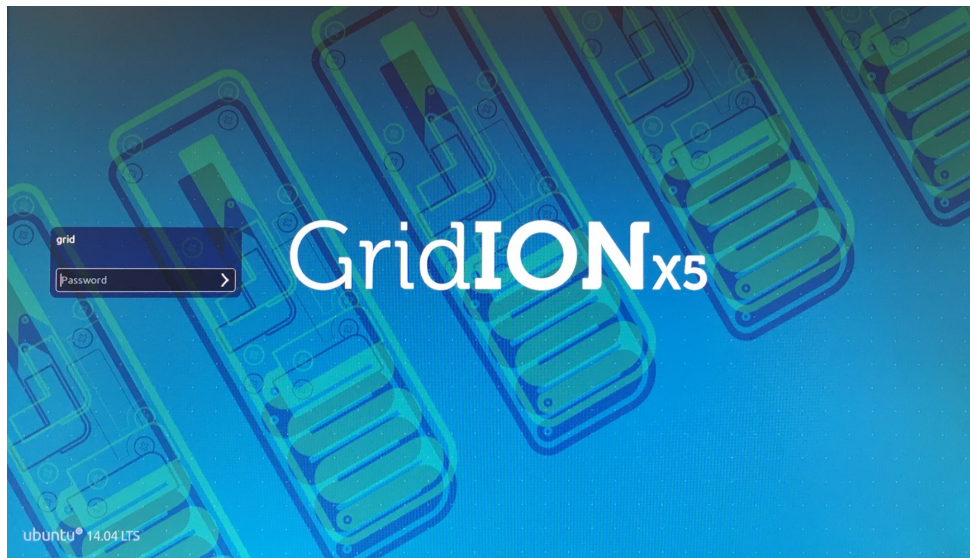



## Computer requirements and software

Version: LMP\_9101\_v1\_rev4\_01Jul2020

- 2 **Open the GridION lid and insert the flow cell. Press down firmly on the flow cell to ensure correct thermal and electrical contact.**

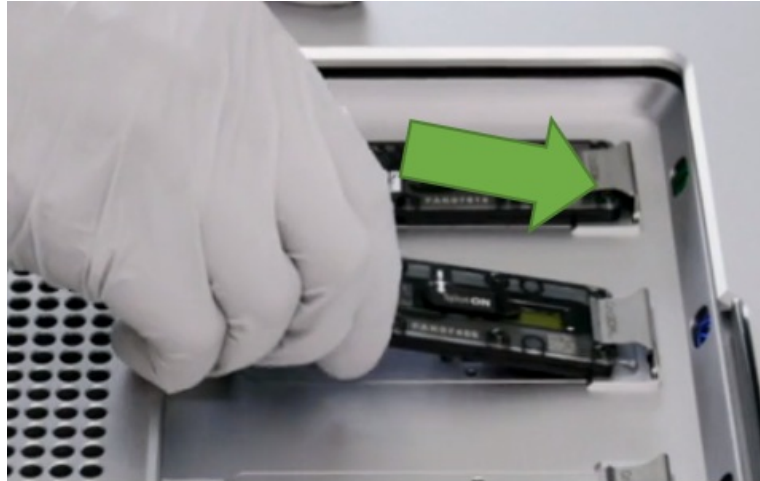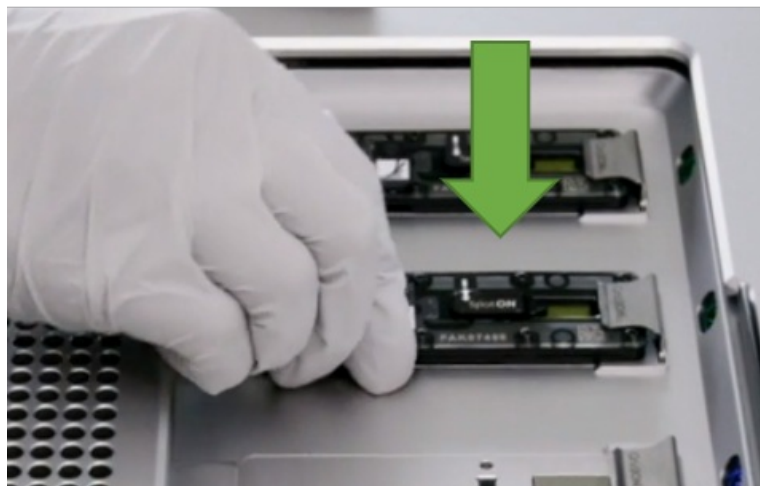

## Computer requirements and software

Version: LMP\_9101\_v1\_rev4\_01Jul2020

- 3 Click the Nanopore Wheel icon on the desktop to load the MinKNOW software. You will see the MinKNOW user interface appear.

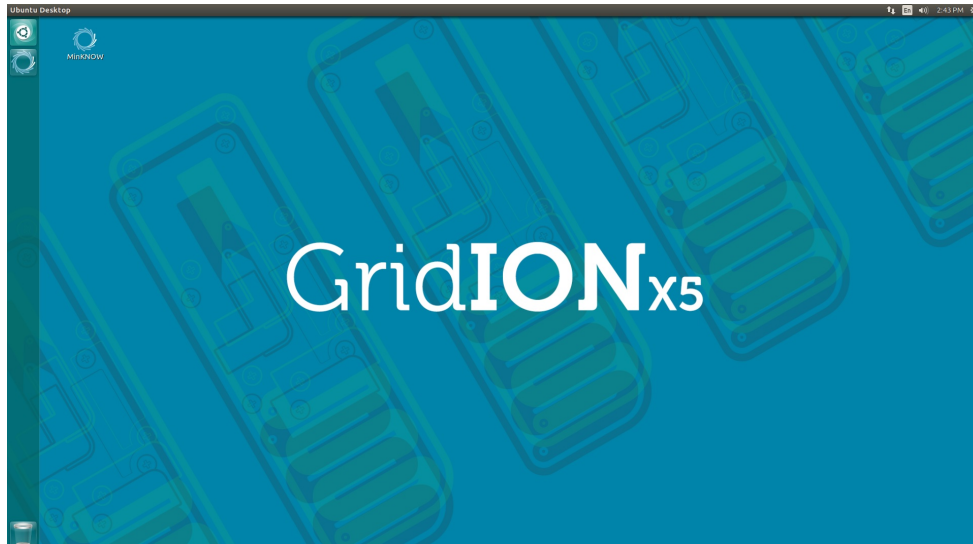

- 4 Check the "Available" box for all flow cells to be checked.

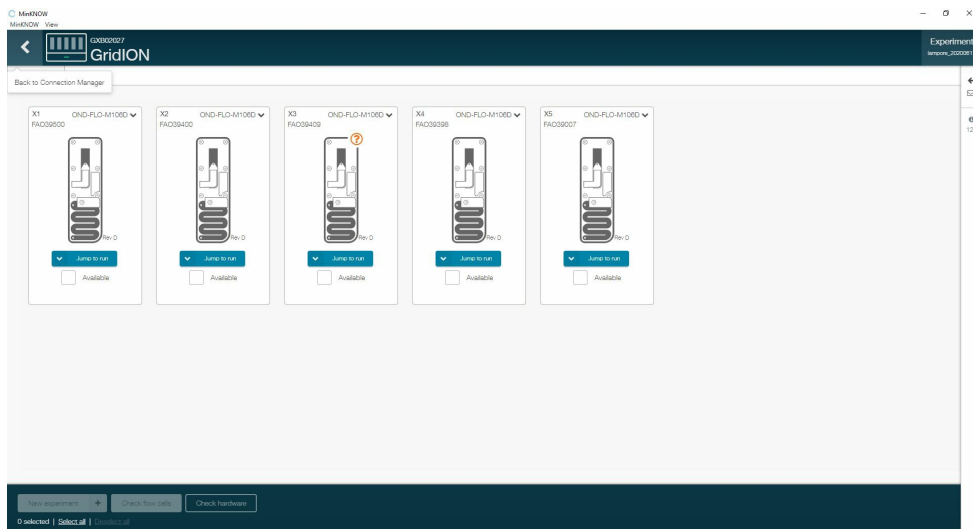

- 5 Click "Check flow cells" at the bottom of the screen.

## Computer requirements and software

Version: LMP\_9101\_v1\_rev4\_01Jul2020

### 6 Click "Start test". The flow cell check will take approximately 10 minutes.

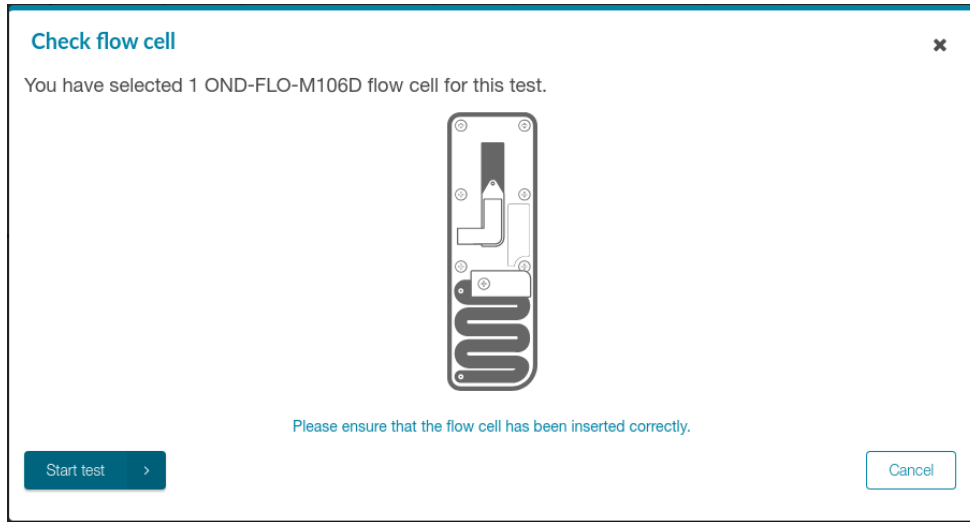

### The quality of the flow cell will be shown as one of the three outcomes:

1. **A question mark** - A Flow Cell Check has not been run on the flow cell during this MinKNOW session.

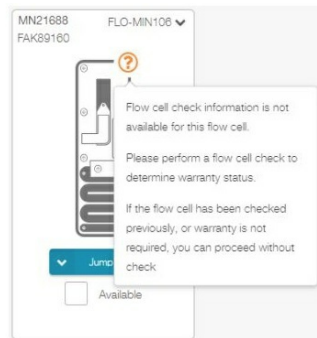

2. **A green tick** - The flow cell is within warranty and can be used for a LamPORE test.

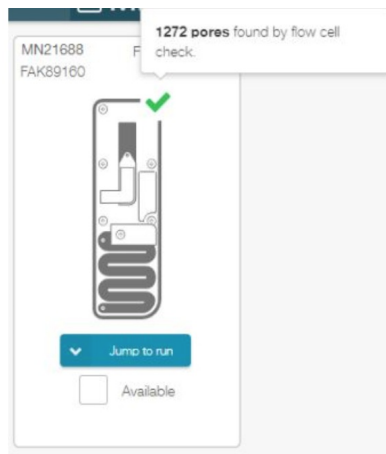

3. **A yellow exclamation mark** - The flow cell is below warranty and should not be used for the LamPORE test. Please contact [support@nanoporetech.com](mailto:support@nanoporetech.com) to arrange a replacement.

## LAMP and library preparation

Version: LMP\_9101\_v1\_rev4\_01Jul2020

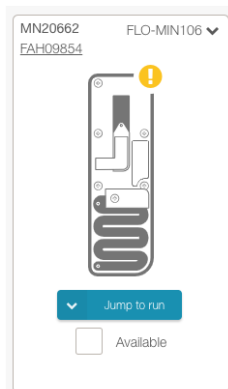

**Note:** The indicator of quality (question mark, exclamation mark or tick) will only remain visible during a MinKNOW session. Once the MinKNOW service has ended, the status of the flow cell will be erased.

### END OF STEP

Flow cell check complete.

# Reverse Transcription Loop-mediated Isothermal Amplification (RT-LAMP)

~60 minutes

## Materials

- RNA samples
- LAMP Primer Mix plate
- LAMP Master Mix plate
- No Template Control (NTC)
- Positive Control (CTL)

## Consumables

- Nuclease-free water (e.g. ThermoFisher, cat # AM9937)
- 96-well plate lids or seals
- 0.2 ml 96-well PCR plate
- 0.2 ml thin-walled PCR tubes
- Nuclease-free pipette filter tips

## Equipment

- PCR hood or bubble
- Thermal cycler with 96-well block
- Vortex mixer with plate adapter
- Centrifuge capable of taking 96-well plates
- Multichannel pipettes suitable for dispensing 2–20  $\mu$ l and 20–200  $\mu$ l, and tips
- P20 pipette
- P2 pipette
- Ice bucket with ice

LAMP and library preparation

Version: LMP\_9101\_v1\_rev4\_01Jul2020

**IMPORTANT**

**LAMP can produce large numbers of easily-amplifiable molecules after a successful reaction, and therefore the risk of cross-contamination between samples must be mitigated.**

- The Amplification (RT-LAMP) must be performed in a PCR hood or bubble in a completely separate area to the library preparation
- Use dedicated pipettes for LAMP reagents
- After the LAMP reaction is complete, remove the seal from the PCR plate very carefully to avoid splashing/cross-contamination between wells
- Clean down hoods and surfaces with an appropriate cleaning agent (e.g. bleach) before and after the RT-LAMP step and between reagent plates

**IMPORTANT**

**RNA handling best practice**

- Perform the sample handling in a PCR hood
- Use dedicated pipettes that are reserved only for RNA work
- Use filter pipette tips for the RNA processing and LAMP
- Decontaminate all equipment and surfaces before and after performing the LAMP and library preparation

**Barcoding of samples**

This method uses a combinatorial barcoding approach. One set of barcodes is contained in the FIP primers used in the LAMP reactions, and an additional set of Rapid Barcodes is also supplied. All samples and controls in a given row of the plate will receive the same FIP barcode, and all samples and controls in a given column of the plate will receive the same Rapid Barcode, as shown in the figure below.

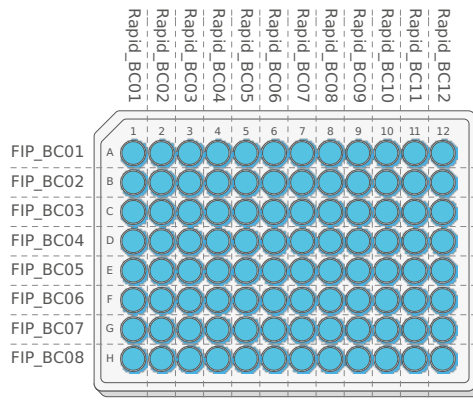

Here, samples in row A of the plate receive FIP barcode Q1, samples in row B receive barcode FIP Q2 etc. Meanwhile, samples in column 1 receive the Rapid Barcode 01, samples in column 2 receive the Rapid Barcode Q2 etc. This way, each sample will receive a unique combination of FIP barcode and Rapid Barcode.

It is necessary to include at least two wells of No Template Control and at least two wells of Positive Control per plate, which leaves a maximum of 92 samples per plate. If you are running fewer than 92 samples at a time, we recommend filling up columns rather than rows with samples. Any unused wells in a column should be filled with LAMP Master Mix/LAMP Primers and 20 µl nuclease-free water and processed in the same way as a sample.

LAMP and library preparation

Version: LMP\_9101\_v1\_rev4\_01Jul2020

**1 Prepare the RNA samples and reagents as follows:**

| Reagent                   | Thaw                | Mix/spin             | Store  |
|---------------------------|---------------------|----------------------|--------|
| RNA samples               | On ice              | Vortex and spin down | On ice |
| LAMP Master Mix (LMM)     | At room temperature | Spin down the plate  | On ice |
| LAMP Primer Mixes (LPM)   | At room temperature | Spin down the plate  | On ice |
| Positive Control (CTL)    | On ice              | Vortex and spin down | On ice |
| No Template Control (NTC) | At room temperature | Vortex and spin down | On ice |

**2 Add 2 ml of nuclease-free water directly to the CTL tube. Mix well by vortexing, and spin down.**

**3 Using a multichannel pipette, transfer 5 µl of LAMP Primer Mix from column 1 of the LAMP Primer Mix plate into column 1 of a clean 96-well plate. Repeat for additional columns depending on the number of samples being tested: for 8 samples (inclusive of any controls and empty wells), transfer one column of reagents, for 16 samples transfer two columns of reagents etc., up 96 samples (all 12 columns).**

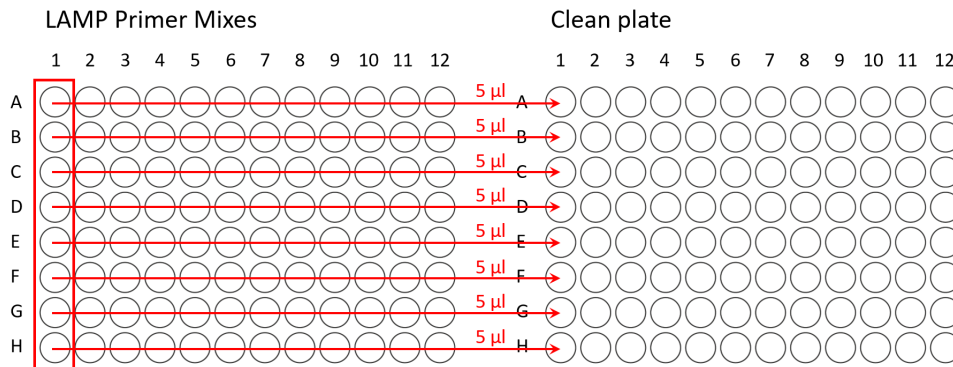

**4 Using a multichannel pipette, add 25 µl of LAMP Master Mix reagent into each well of the 96-well plate with LAMP Primers added. Mix by pipetting up and down.**

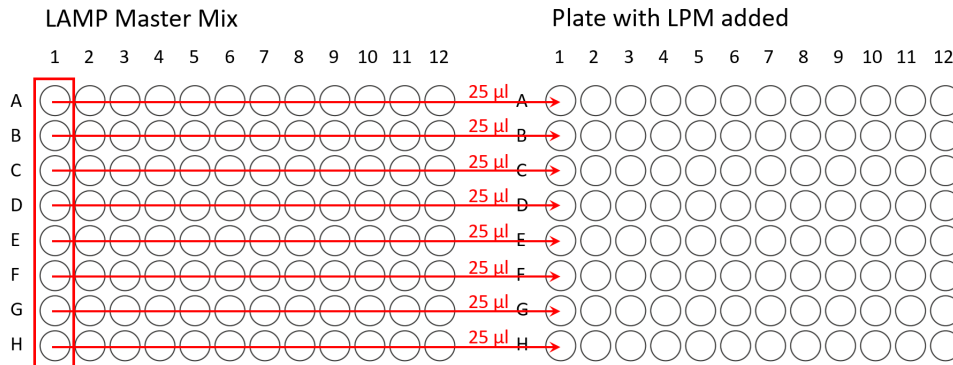

## Library preparation

Version: LMP\_9101\_v1\_rev4\_01Jul2020

- 5 Add 20 µl of RNA sample or NTC to each well. For positive control wells, add 5 µl of CTL to each well, followed by 15 µl nuclease-free water to bring the total volume to 20 µl. Make up any unused wells with 20 µl nuclease-free water.**

Include at least two wells of No Template Control and at least two wells of Positive Control per plate. Make a note of the positions of the wells that contain CTL and NTC.

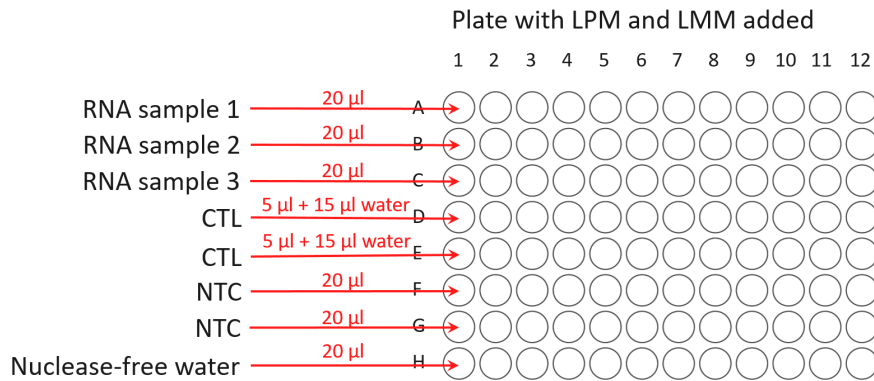

In this example, three different patient RNA samples are added to wells A1-C1. There are two wells of Positive Control (D1-E1) and two wells of No Template Control (F1-G1). Because the last well (H1) in the column contains no sample or control, it is filled with nuclease-free water.

- 6 Mix the contents of each well by pipetting up and down, taking care not to cross-contaminate different wells.**
- 7 Seal the plate and spin down.**
- 8 Incubate the plate in a thermal cycler at 65°C for 35 minutes, then at 80°C for 5 minutes.**

### Optional Action

If necessary, the protocol can be paused at this point. The samples should be kept at 4°C and can be stored overnight.

- 9 Spin down the plate to bring all samples to the bottom of the wells. Remove the seal from the plate carefully, avoiding sample splashing and cross-contamination between wells.**
- 10 For each column of the plate (e.g. wells A1-H1), pool the reactions by transferring 2 µl of LAMP products from each well into a clean 0.2 ml thin-walled PCR tube. Pipette very carefully to avoid cross-contamination between wells.**
- 11 Mix the contents of each tube by pipetting up and down using a multichannel pipette, and spin down.**

## Library preparation

~35 minutes

### Materials

- Rapid Barcodes plate
- SPRI beads (SPRI)

## Library preparation

Version: LMP\_9101\_v1\_rev4\_01Jul2020

- Rapid Adapter (RAP)
- Elution Buffer from the Cxford Nanopore kit (EB)

### Consumables

- 0.2 ml thin-walled PCR tubes
- 1.5 ml Eppendorf DNA LoBind tubes
- Nuclease-free water (e.g. ThermoFisher, cat # AM9937)
- Freshly prepared 80% ethanol in nuclease-free water
- Nuclease-free pipette filter tips

### Equipment

- Thermal cycler at 30°C and 80°C
- Microfuge
- P10 pipette
- Multichannel pipettes suitable for dispensing 0.5–10 µl, 2–20 µl and 20–200 µl, and tips
- Magnetic rack

#### 1 Prepare the remaining reagents as follows:

| Reagent                     | Thaw                | Mix/spin             | Store               |
|-----------------------------|---------------------|----------------------|---------------------|
| Rapid Barcodes plate (RBxx) | At room temperature | Spin down the plate  | On ice              |
| SPRI beads (SPRI)           | At room temperature | Vortex and spin down | At room temperature |
| Rapid Adapter (RAP)         | At room temperature | Vortex and spin down | On ice              |
| Elution Buffer (EB)         | At room temperature | Vortex and spin down | On ice              |

#### 2 Add 6.5 µl nuclease-free water to clean 0.2 ml thin-walled PCR tubes, one for each pool of reverse-transcribed and amplified RNA samples. Then add 1 µl of the RNA sample pools to each tube:

| Reagent                          | Volume        |
|----------------------------------|---------------|
| Nuclease-free water              | 6.5 µl        |
| 1 µl of each pool of RNA samples | 1 µl          |
| <b>Total</b>                     | <b>7.5 µl</b> |

#### 3 To each tube, add 2.5 µl of Rapid Barcodes (one for each pool of LAMP products). These are in row A of the Rapid Barcode plate: RB01-12 are in wells A1-A12.

#### 4 Mix gently by flicking the tubes, and spin down.

#### 5 Incubate the tubes in a thermal cycler at 30°C for 2 minutes and then at 80°C for 2 minutes. Briefly put the tubes on ice to cool them down, and spin down in a microfuge.

#### Optional Action

If necessary, the protocol can be paused at this point. The samples should be kept at 4°C and can be stored overnight.



## Library preparation

Version: LMP\_9101\_v1\_rev4\_01Jul2020

- 6 Combine all reactions into a single 1.5 ml Eppendorf DNA LoBind tube for a total volume of 120  $\mu$ l (or less, if fewer than 96 wells were used).**
- 7 Resuspend the tube of SPRI beads by vortexing.**
- 8 To the entire pooled barcoded sample from Step 6, add 0.8x volume of resuspended SPRI beads (e.g. add 96  $\mu$ l SPRI beads to 120  $\mu$ l sample), and mix by pipetting up and down.**

|                      | <b>1 column</b> | <b>6 columns</b> | <b>12 columns</b> |
|----------------------|-----------------|------------------|-------------------|
| Pooled sample volume | 10 $\mu$ l      | 60 $\mu$ l       | 120 $\mu$ l       |
| SPRI beads           | 8 $\mu$ l       | 48 $\mu$ l       | 96 $\mu$ l        |

- 9 Incubate for 5 minutes at room temperature.**
- 10 Prepare 500  $\mu$ l of fresh 80% ethanol in nuclease-free water.**
- 11 Spin down the sample and pellet the beads on a magnet for a minimum of 2 mins, or until the solution becomes clear. Keep the tube on the magnet, and pipette off the supernatant.**
- 12 Take the tubes off the magnet, and wash the beads by resuspending them thoroughly with 200  $\mu$ l of freshly-prepared 80% ethanol. Return the tubes to the magnet and pellet the beads for 2 mins, or until the solution is clear. Remove the ethanol using a pipette and discard.**
- 13 Repeat the previous step.**
- 14 Spin down and place the tube back on the magnet. Pipette off any residual ethanol. Allow to dry for 30 seconds, but do not dry the pellet to the point of cracking.**
- 15 Remove the tube from the magnetic rack and resuspend the pellet by pipetting in 15  $\mu$ l Elution Buffer (EB). Spin down and incubate for 5 minutes at room temperature.**
- 16 Pellet the beads on a magnet for 2 mins, or until the eluate is clear and colourless.**
- 17 Remove and retain 11  $\mu$ l of eluate into a clean 1.5 ml Eppendorf DNA LoBind tube.**
- 18 Add 1  $\mu$ l of RAP to the barcoded DNA.**
- 19 Mix gently by pipetting and spin down.**
- 20 Incubate the reaction for 5 minutes at room temperature.**

## Priming and loading the flow cell

Version: LMP\_9101\_v1\_rev4\_01Jul2020

### END OF STEP

The prepared library is used for loading onto the flow cell. Store the library on ice until ready to load.

# Priming and loading the flow cell

~10 minutes

### Materials

- Flush Tether (FLT)
- Flush Buffer (FB)
- Sequencing Buffer (SQB)
- Loading Beads (LB)

### Consumables

- CND Flow Cell (CND-FLC-M106D)
- 1.5 ml Eppendorf DNA LoBind tubes
- Nuclease-free water (e.g. ThermoFisher, cat # AM9937)

### Equipment

- CND GridION Mk1 (CND-GRD003)
- P1000 pipette and tips
- P100 pipette and tips
- P20 pipette and tips
- P10 pipette and tips

## 1 Prepare the remaining kit reagents as follows:

| Reagent                 | Thaw                | Mix/spin             | Store  |
|-------------------------|---------------------|----------------------|--------|
| Sequencing Buffer (SQB) | At room temperature | Vortex and spin down | On ice |
| Loading Beads (LB)      | At room temperature | -                    | On ice |
| Flush Tether (FLT)      | At room temperature | Vortex and spin down | On ice |
| Flush Buffer (FB)       | At room temperature | Vortex and spin down | On ice |

## Priming and loading the flow cell

Version: LMP\_9101\_v1\_rev4\_01Jul2020

- 2 Slide the priming port cover of the flow cell clockwise to open the priming port.**

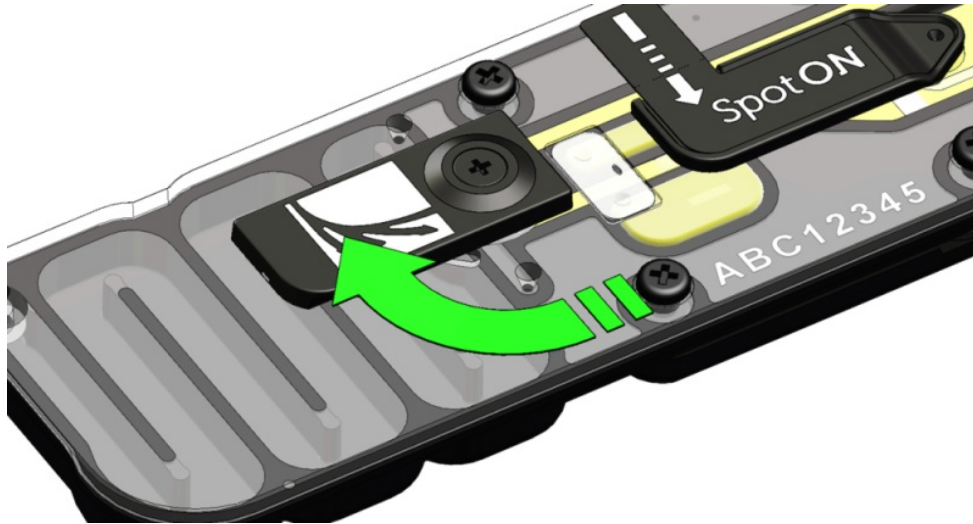

- 3 After opening the priming port, check for a small air bubble under the cover. Draw back 20-30  $\mu$ l to remove any bubbles:**

1. Set a P1000 pipette to 200  $\mu$ l
2. Insert the tip into the priming port
3. Turn the wheel until the dial shows 220-230  $\mu$ l, or until you can see a small volume of buffer entering the pipette tip

Visually check that there is continuous buffer from the priming port across the sensor array.

### IMPORTANT

**Take care when drawing back buffer from the flow cell. Do not remove more than 20-30  $\mu$ l, and make sure that the array of pores are covered by buffer at all times. Introducing air bubbles into the array can irreversibly damage pores.**

- 4 To prepare the flow cell priming mix, add 30  $\mu$ l of thawed and mixed Flush Tether (FLT) directly to the tube of thawed and mixed Flush Buffer (FB), and mix by vortexing.**
- 5 Load 800  $\mu$ l of the priming mix into the flow cell via the priming port, avoiding the introduction of air bubbles. Wait for 5 minutes. During this time, prepare the library for loading by following the steps below.**
- 6 Thoroughly mix the contents of the Loading Beads (LB) by pipetting.**

### IMPORTANT

**The Loading Beads (LB) tube contains a suspension of beads. These beads settle very quickly. It is vital that they are mixed immediately before use.**

## Sequencing and data analysis

Version: LMP\_9101\_v1\_rev4\_01Jul2020

### 7 In a new tube, prepare the library for loading as follows:

| Reagent                                          | Volume                      |
|--------------------------------------------------|-----------------------------|
| Sequencing Buffer (SQB)                          | 37.5 $\mu$ l                |
| Loading Beads (LB), mixed immediately before use | 25.5 $\mu$ l                |
| DNA library                                      | 12 $\mu$ l                  |
| <b>Total</b>                                     | <b>75 <math>\mu</math>l</b> |

### 8 Complete the flow cell priming:

1. Gently lift the SpotON sample port cover to make the SpotON sample port accessible.
2. Load **200  $\mu$ l** of the priming mix into the flow cell via the priming port (**not** the SpotON sample port), avoiding the introduction of air bubbles.

### 9 Mix the prepared library gently by pipetting up and down just prior to loading.

### 10 Add 75 $\mu$ l of sample to the flow cell via the SpotON sample port in a dropwise fashion. Ensure each drop flows into the port before adding the next.

### 11 Gently replace the SpotON sample port cover, making sure the bung enters the SpotON port, close the priming port and replace the GridION lid.

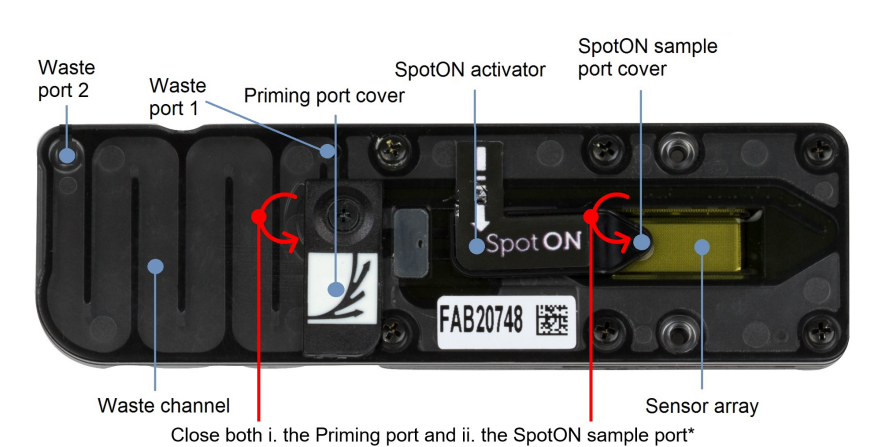

\*Both ports are shown in a closed position

## Data acquisition and basecalling

Sequencing and data analysis

Version: LMP\_9101\_v1\_rev4\_01Jul2020

- 1 Click the Nanopore Wheel icon on the desktop to load the MinKNOW software. You will see the MinKNOW user interface appear.

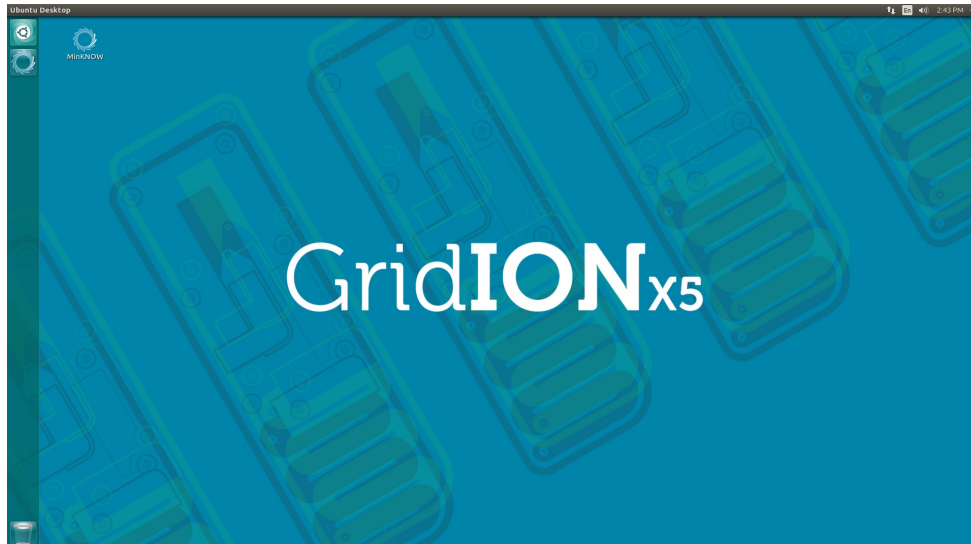

- 2 Select the flow cells to be run by checking the "Available" box.

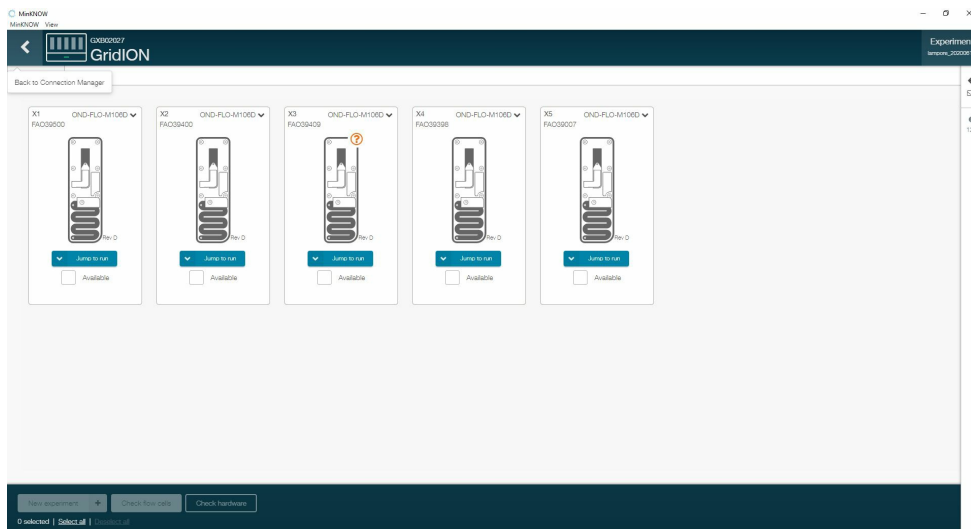

- 3 Click the "New Experiment" button at the bottom left of the GUI.

- 4 On the New experiment popup screen, select the running parameters for your experiment from the individual tabs:

## Sequencing and data analysis

Version: LMP\_9101\_v1\_rev4\_01Jul2020

### 5 Experiment

The Experiment tab will show the flow cells chosen. An experiment name can then be assigned to all flow cells.

Fill in the **Experiment** field with the operator name or ID. Fill in the **Sample** field with a unique name. Experiment name and Sample ID should not contain personally-identifiable information.

The other tabs will not become available until an experiment name has been provided.

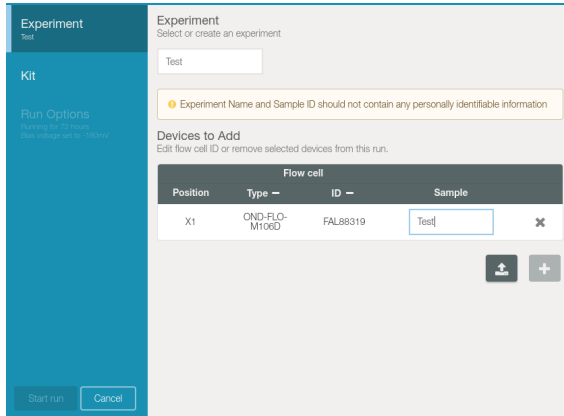

### 6 Kit selection

You will be presented with four kit options. Choose OND-SQK-LP0096S.

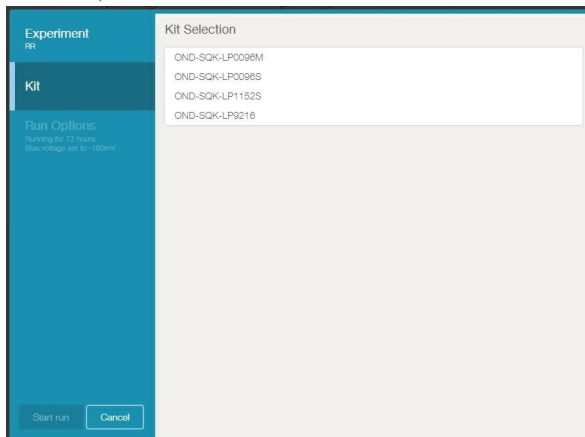

## Sequencing and data analysis

Version: LMP\_9101\_v1\_rev4\_01Jul2020

### 7 Run Options

Keep these at their default values.

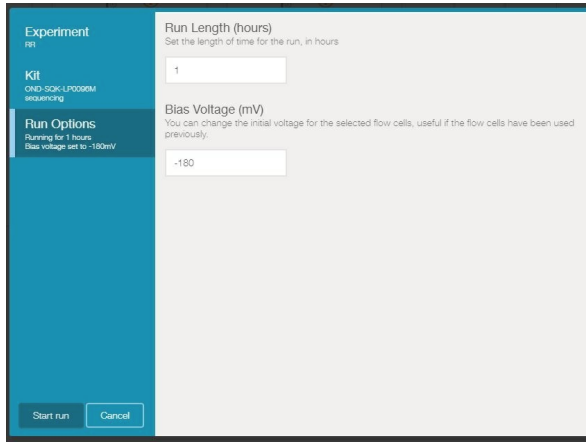

### 8 Click "Start run"

The pop up box will disappear, and the flow cells will become greyed out.

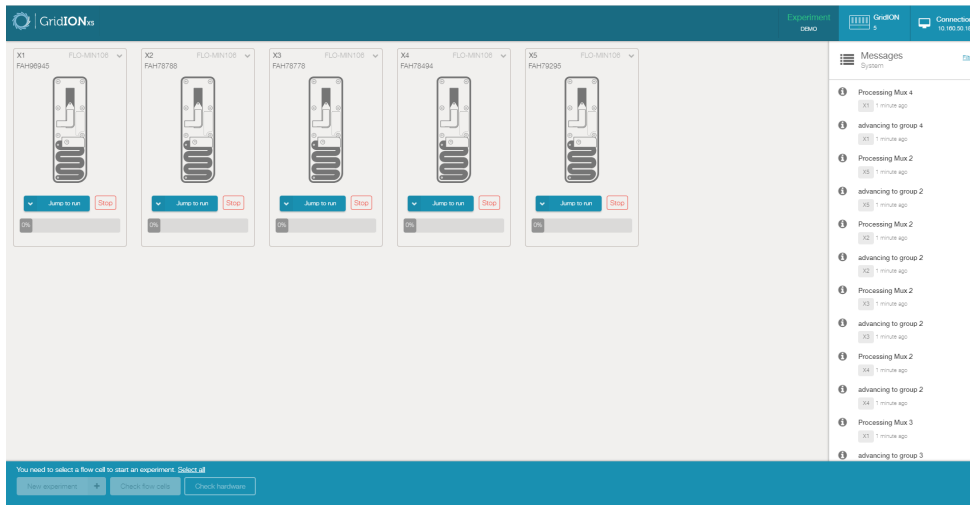

### 9 Allow the script to run to completion.

The Message panel in the GUI will inform you when the experiment is complete.

## Downstream analysis

Version: LMP\_9101\_v1\_rev4\_01Jul2020

### IMPORTANT

The data analysis pipeline will start automatically at the end of the sequencing experiment.

At this point, do NOT click the **Stop** button, as this will cancel the downstream data analysis.

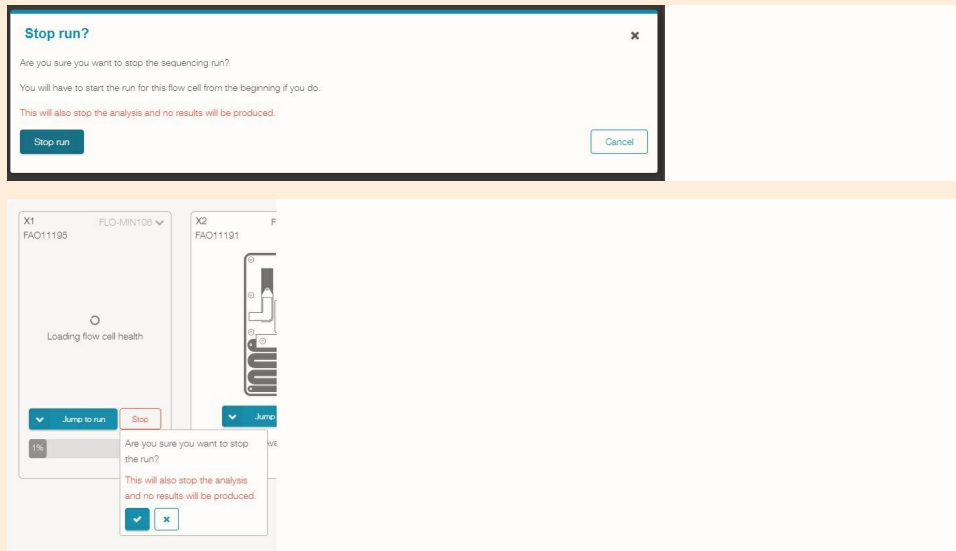

## Downstream analysis

### Output of the sequencing and analysis pipeline

The files with test results are placed in the /data folder, with the following structure/file naming convention:

```
{reads_dir}/  
{experiment_id}/  
{sample_id}/  
{date_time}_{device_id}_{flowcell_id}_{protocol_hash}/
```

e.g. /data/lampore\_20200617/lampore/20200617\_1636\_X1\_FA039500\_e29f6fcd

The experiment results can be found in the PDF report and the barcode\_counts TSV file.



## Downstream analysis

Version: LMP\_9101\_v1\_rev4\_01Jul2020

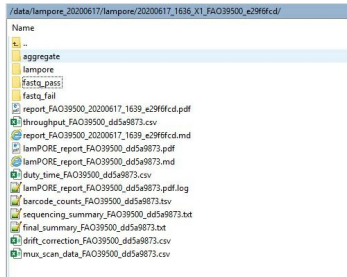

### Analysis report

The report is a TSV file describing the number of reads which align to given targets and have given barcodes. A PDF report is also generated, containing classification results for every barcoded sample.

The fields in the TSV file are as follows:

| Column              | Meaning                                                                                                                                                                                                                                                                                                                                                                                                                                                             |
|---------------------|---------------------------------------------------------------------------------------------------------------------------------------------------------------------------------------------------------------------------------------------------------------------------------------------------------------------------------------------------------------------------------------------------------------------------------------------------------------------|
| Barcode             | RB and FIP barcode combination                                                                                                                                                                                                                                                                                                                                                                                                                                      |
| target_human_ACTB   | Number of reads aligning to the Actin B target                                                                                                                                                                                                                                                                                                                                                                                                                      |
| target_nCoV2019_AS1 | Number of reads aligning to the ORF1a target in the SARS-CoV-2 genome                                                                                                                                                                                                                                                                                                                                                                                               |
| target_nCoV2019_E1  | Number of reads aligning to the E1 target in the SARS-CoV-2 genome                                                                                                                                                                                                                                                                                                                                                                                                  |
| target_nCoV2019_N2  | Number of reads aligning to the N2 target in the SARS-CoV-2 genome                                                                                                                                                                                                                                                                                                                                                                                                  |
| target_unclassified | Number of unclassified reads (one barcode is missing)                                                                                                                                                                                                                                                                                                                                                                                                               |
| call                | <p><b>Positive:</b> SARS-CoV-2 detected (<math>\geq 50</math> SARS-CoV-2 reads)</p> <p><b>Inconclusive:</b> The test should be repeated (<math>20 \leq</math> SARS-CoV-2 reads <math>\leq 49</math>)</p> <p><b>Negative:</b> SARS-CoV-2 not detected (<math>&lt; 20</math> SARS-CoV-2 reads)</p> <p><b>Invalid:</b> insufficient number (<math>&lt; 50</math>) of classified reads from both SARS-CoV-2 and Actin B to make a call; the test should be repeated</p> |

An example PDF report from the analysis pipeline and example TSV file are attached below.

[Example report](#)

[Example TSV file](#)

### Analysis of controls

During the LAMP and library preparation, two controls from the kit are included: CTL (positive control), and NTC (no template control).

When preparing your samples, make a note of the positions of the CTL and NTC wells in each plate. Check the results in the report for these positions:

**NTC** contains no SARS-CoV-2 DNA, and should give an Invalid result in the call column of the TSV file. If it shows a Positive result, this means that all tests in this plate are void and need to be re-run.

**CTL** contains SARS-CoV-2 RNA, and is expected to give a Positive result. If it shows a Negative result, this means that all tests in this plate are void and need to be re-run.
